# Supplementary material for: Self-assembly study of Type I collagen extracted from male Wistar Hannover rat tail tendons
Source: Research Square preprint supplement (doi:10.21203/rs.3.rs-44846/v2), 2020-10-16
Supplement: Supplementary file 1 [file 136bce9f7891852603b0a8fc.docx]

**
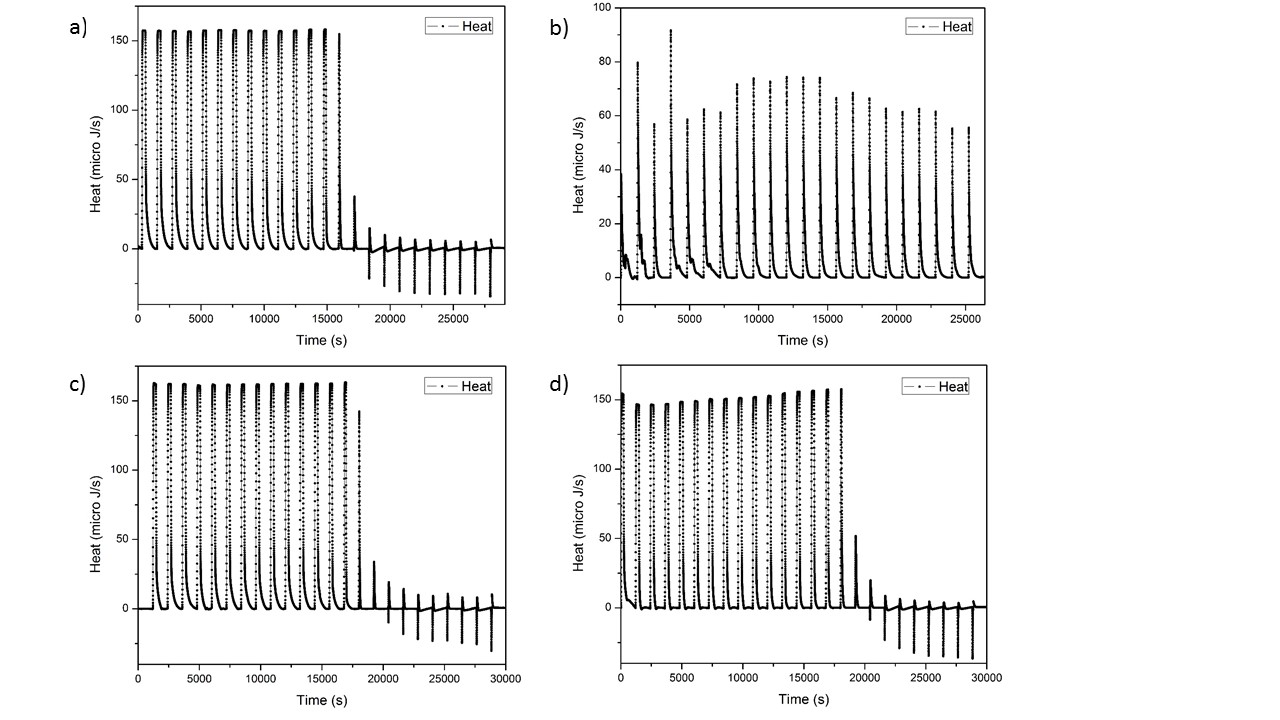
**

Heat aggregation of extracted collagen by isotherm titration calorimetry (Nano ITC) sensed from the injection of: a) the base solution over the acid, b) the acid solution over collagen, c) the base solution over the acid collagen solution, d) the base solution over the collagen gelatin, obtained from Wistar Hannover rat tail
